# Supplementary material for: Structural and optical properties of methylhydrazinium lead bromide perovskites under pressure
Source: Royal Society of Chemistry journal article supplement (doi:10.1039/d3ta06849h), 2023-12-18
Supplement: d3ta06849h1.pdf [file d3ta06849h1.pdf]

## Electronic Supplementary Information

### **Structural and Optical Properties of Methylhydrazinium Lead Bromide Perovskites Under Pressure**

Marek Szafranski

*Faculty of Physics, Adam Mickiewicz University, Uniwersytetu Poznańskiego 2, 61-614*

*Poznań, Poland*

Corresponding author e-mail: [masza@amu.edu.pl](mailto:masza@amu.edu.pl)

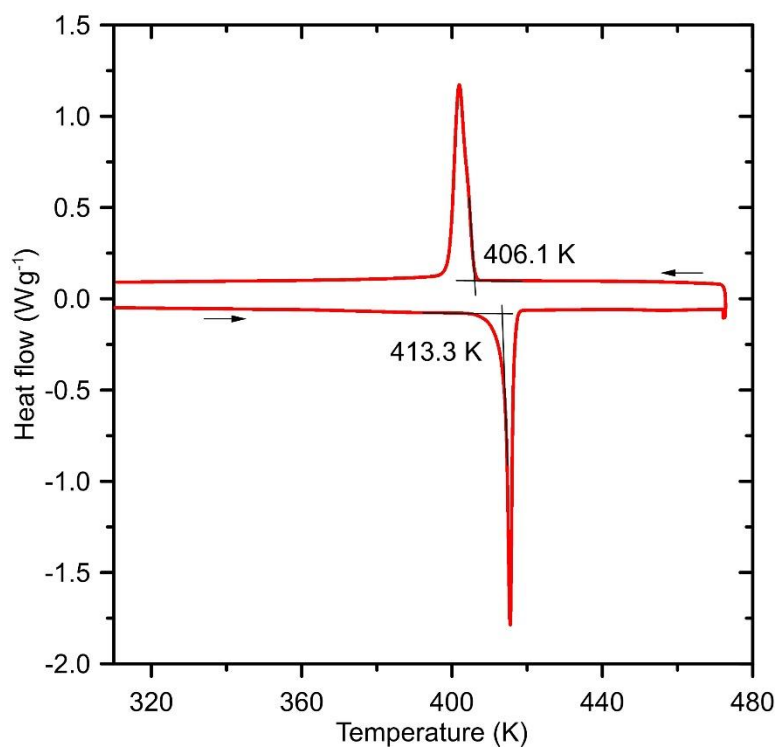

**Fig. S1.** DSC heating and cooling runs measured across the phase transition region for polycrystalline sample of MHyPbBr<sub>3</sub>. The heat flow was recorded at a rate of temperature changes 10 K/min.

**Table S1.** Coefficients of Birch-Murnaghan equations of states for phases II and III of MHyPbBr<sub>3</sub>.

| Equation order  | $V_0$     | $B_0$    | $B_0'$  |
|-----------------|-----------|----------|---------|
| Phase II        |           |          |         |
| 3 <sup>rd</sup> | 831.2(9)  | 17.9(11) | 6.9(14) |
| 2 <sup>nd</sup> | 830.0(8)  | 20.2(4)  | 4       |
| Phase III       |           |          |         |
| 2 <sup>nd</sup> | 808.4(33) | 23.6(11) | 4       |

**Table S2.** Coefficients of Birch-Murnaghan equations of states for phases II and V of MAPbBr<sub>3</sub>.

| Equation order  | $V_0$    | $B_0$   | $B_0'$ |
|-----------------|----------|---------|--------|
| Phase II        |          |         |        |
| 2 <sup>nd</sup> | 207.6(5) | 15.1(6) | 4      |
| Phase III       |          |         |        |
| 2 <sup>nd</sup> | 207.8(8) | 12.9(6) | 4      |

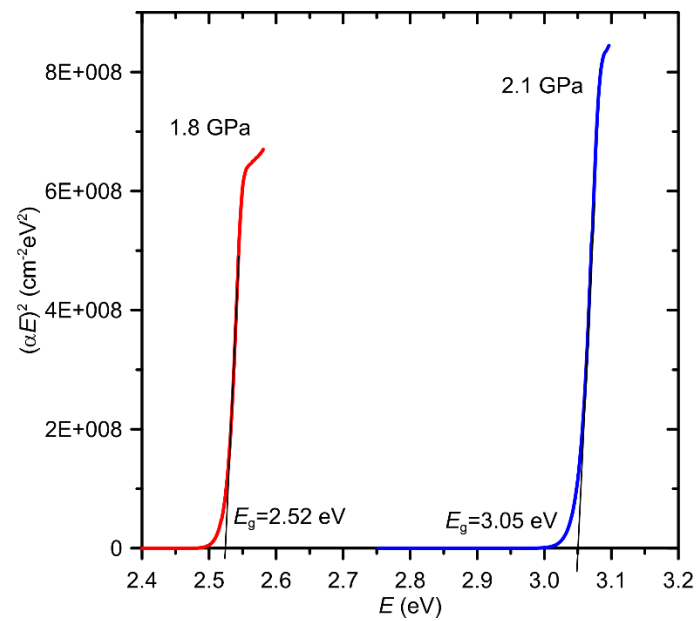

**Fig. S2.** Tauc plots illustrating the energy gap determination of MHyPbBr<sub>3</sub> in phase II at 1.8 GPa and in phase III at 2.1 GPa.
